# Supplementary material for: Enhanced amperometric acetone sensing using electrospun non-stoichiometric WO3−x nanofibers
Source: Royal Society of Chemistry journal article supplement (doi:10.1039/d0tc04922k), 2020-11-23
Supplement: d0tc04922k1.pdf [file d0tc04922k1.pdf]

## Supplementary Information

### Enhanced Amperometric Acetone Sensing Using Electrospun Non-Stoichiometric $WO_{3-x}$ Nanofibers

Muhammad Imran,<sup>a,e,‡</sup> Ebsam Alenezy,<sup>b,c,‡</sup> Ylias Sabri,<sup>b\*</sup> Tony Wang,<sup>a</sup> Tuquabo Tufamichael,<sup>a</sup> Prashant Sonar,<sup>a</sup> Nunzio Motta,<sup>a</sup> and Mahnaz Shafiei<sup>a,d,\*</sup>

<sup>a</sup>Institute for Future Environments and School of Chemistry, Physics, and Mechanical Engineering, Queensland University of Technology (QUT), Brisbane, QLD 4001, Australia

<sup>b</sup> Centre for Advanced Materials and Industrial Chemistry (CAMIC), School of Science, RMIT University, Melbourne 3001, Victoria, Australia

<sup>c</sup>Chemistry department, College of Science and Arts, Al- Qurayyat, Al Jouf University, Kingdom of Saudi Arabia

<sup>d</sup>Faculty of Science, Engineering and Technology, Swinburne University of Technology, Hawthorn, VIC 3122, Australia

<sup>e</sup>Department of Mechanical Engineering, Pakistan Institute of Engineering and Technology, Multan 60000, Punjab, Pakistan.

\*Corresponding author email: [mshafiei@swin.edu.au](mailto:mshafiei@swin.edu.au); [ylias.sabri@rmit.edu.au](mailto:ylias.sabri@rmit.edu.au)

‡ M. I. and E.A. made equal contribution.

Table S1. response magnitude (current) of  $WO_{3-x}$  NFs based sensor towards acetone at 350 °C.

| Acetone (ppm) | Response (%) |          |          |          |
|---------------|--------------|----------|----------|----------|
|               | 3 V Bias     | 5 V Bias | 7 V Bias | 9 V Bias |
| 1.2           | 9.48         | 18.23    | 27.57    | 34.71    |
| 1.8           | 11.75        | 22.43    | 32.72    | 42.95    |
| 2.5           | 13.50        | 25.34    | 37.58    | 49.37    |
| 5.0           | 19.07        | 34.61    | 51.15    | 68.49    |
| 7.5           | 23.21        | 41.02    | 61.71    | 81.18    |
| 10            | 26.67        | 46.35    | 69.17    | 91.42    |
| 12.5          | 29.58        | 50.26    | 74.63    | 99.96    |

Table S2. Normalized response of  $WO_{3-x}$  NFs based sensor towards acetone at 350 °C.

| Acetone (ppm) | Response ( $\mu$ A) |          |          |          |
|---------------|---------------------|----------|----------|----------|
|               | 3 V Bias            | 5 V Bias | 7 V Bias | 9 V Bias |
| 1.2           | 25.03               | 79.55    | 116.08   | 148.13   |
| 1.8           | 50.30               | 95.88    | 141.33   | 183.44   |
| 2.5           | 57.40               | 108.70   | 161.05   | 210.15   |
| 5.0           | 79.52               | 149.31   | 220.79   | 292.95   |
| 7.5           | 97.47               | 178.45   | 262.73   | 348.83   |
| 10            | 112.42              | 201.10   | 295.98   | 395.10   |
| 12.5          | 127.60              | 219.22   | 325.80   | 434.96   |

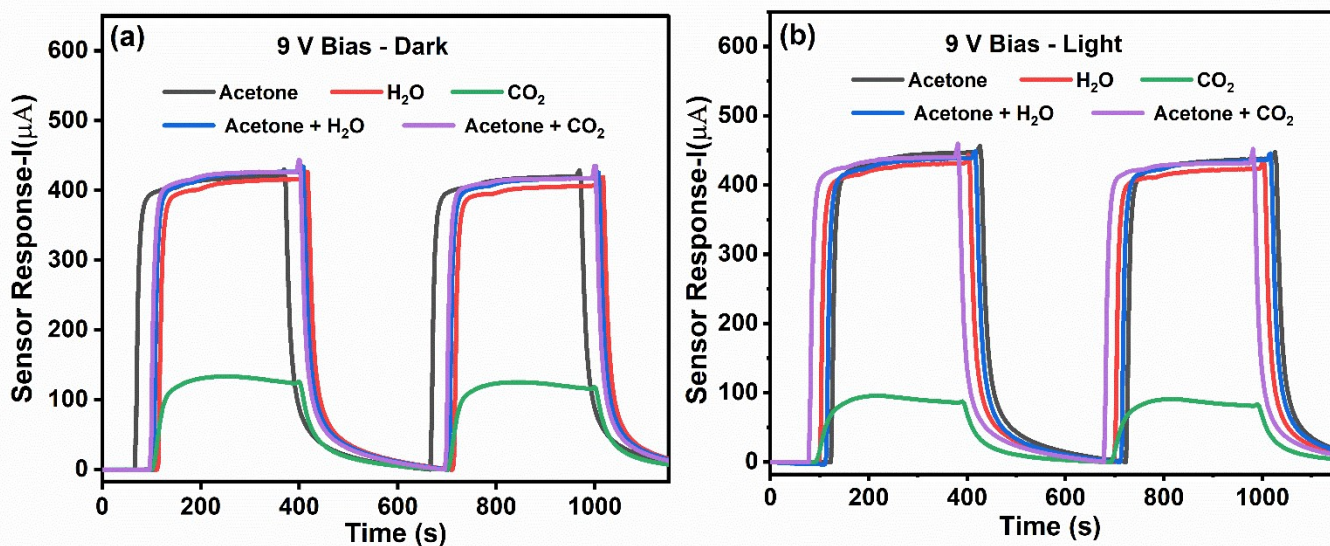

Fig. S1. Normalized response during Selectivity tests of  $\text{WO}_{3-x}$  NFs based sensor (a) under dark and (b) UV conditions in the interfering environment of  $\text{CO}_2$  (500 ppm) and humidity (20% RH at  $30^\circ\text{C}$ ) and 12.5 ppm acetone.

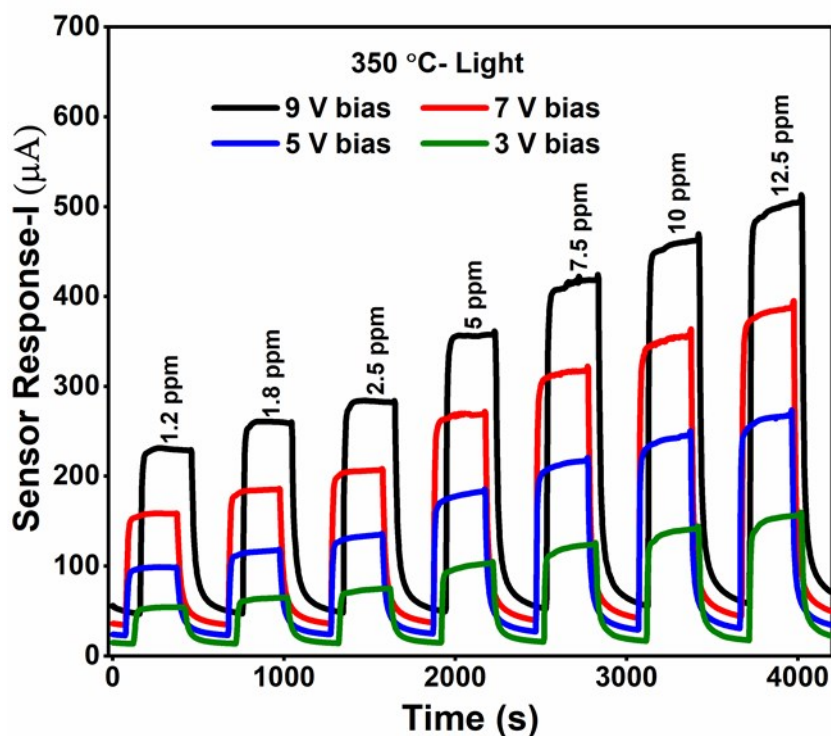

Fig. S2. Gas sensing response of  $\text{WO}_{3-x}$  NFs at  $350^\circ\text{C}$  under UV irradiation for various concentrations and bias voltages.
